# Supplementary material for: Sorbitol Destroyed Intestinal Microfold Cells (M Cells) Development through Inhibition of PDE4-Mediated RANKL Expression
Source: Hindawi journal article supplement (doi:10.1155/2024/7524314), 2024-05-02

**Fig.S1**

**A**

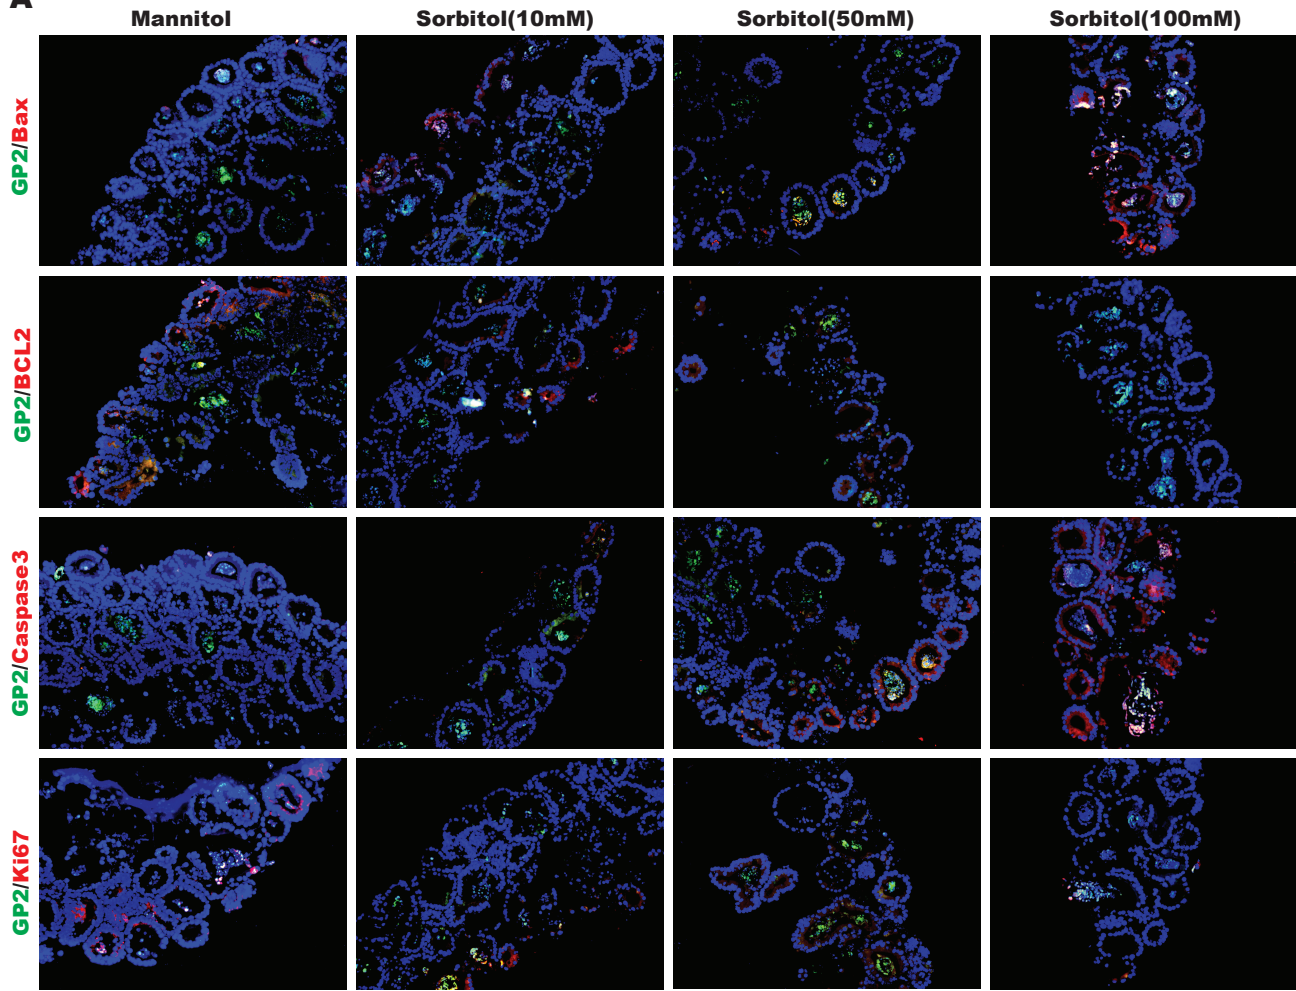

**B**

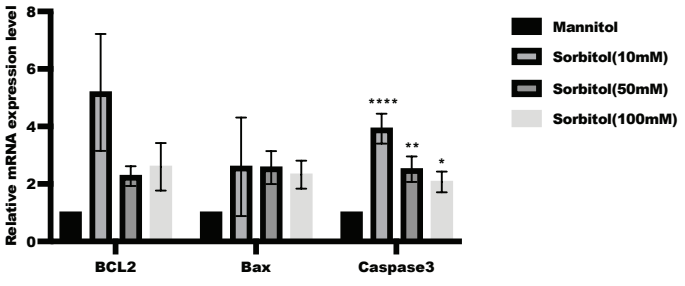

Supplement: f1 [file 7524314.f1.pdf]
